# Supplementary material
Source: MDPI journal article supplement (https://www.mdpi.com/2313-0105/10/3/70)
Supplement: s1 [file s1]

# Bimetal-initiated Concerted Zn Regulation Enabling Highly Stable Aqueous Zn-ion Batteries

Hong Yin<sup>1</sup>, Yuliang Liu<sup>1</sup>, Yifeng Zhu<sup>1</sup>, Fengxiang Ye<sup>2</sup>, Guangliang Xu<sup>\*1</sup>, Mengfang Lin<sup>\*2</sup>, Wenbin Kang<sup>\*1</sup>

<sup>1</sup> State Key Laboratory of Environment-Friendly Energy Materials, School of Materials and Chemistry, Center of Analysis and Characterization, Southwest University of Science and Technology, Mian yang, Sichuan, 621010, China

<sup>2</sup> Department of Materials Engineering, Ming Chi University of Technology, New Taipei City 24301, Taiwan.

\* Corresponding authors: wenbin.kang@swust.edu.cn; mfin@mail.mcut.edu.tw; xuguangliangswust@163.com

## Supplementary materials

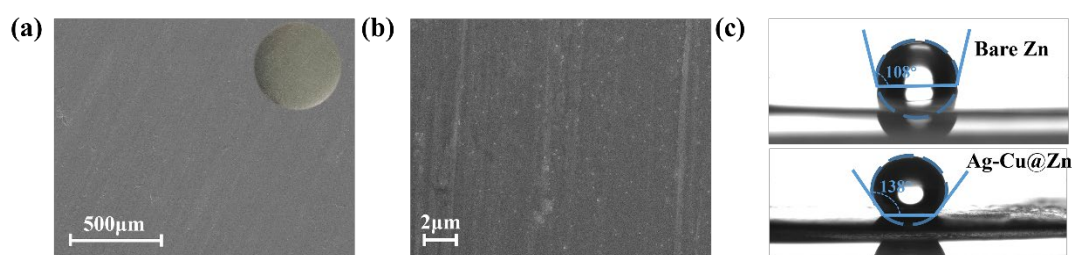

**Figure S1** (a-b) SEM of the bare zinc anode, (c) Contact angle test of Bare Zn and Ag-Cu@Zn electrodes with water.

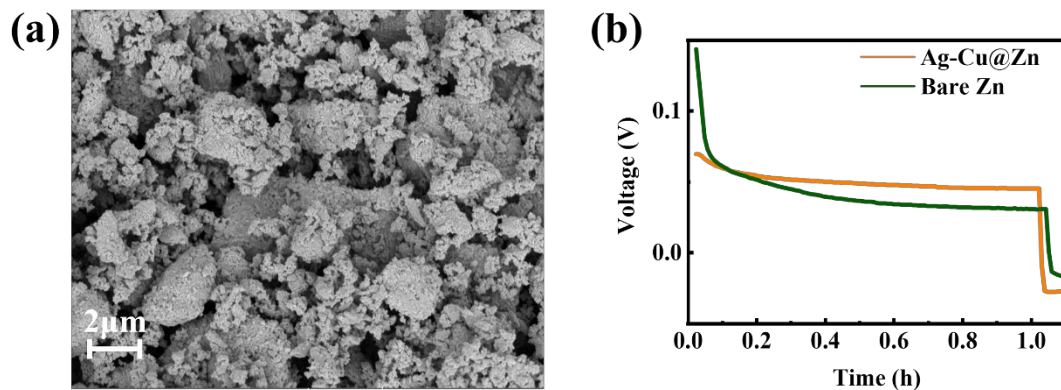

**Figure S2** (a) The SEM image of the commercial MnO<sub>2</sub>, (b) Voltage profiles for the initial Zn nucleation at 0.25 mA cm<sup>-2</sup>.

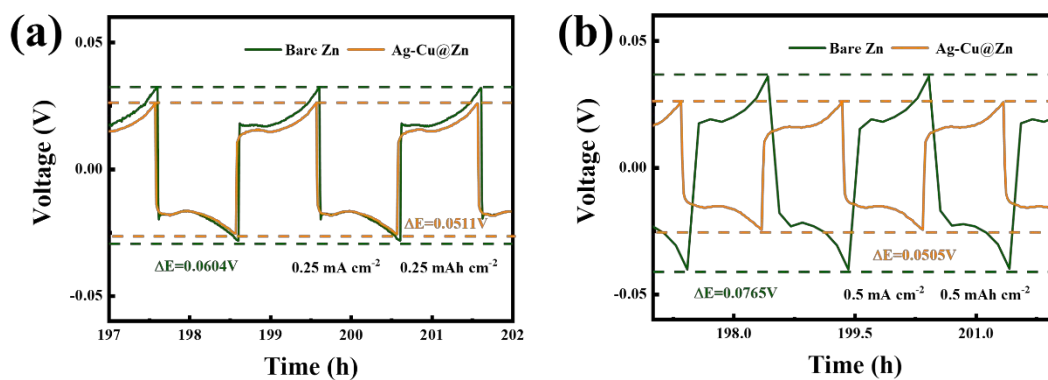

**Figure S3** Detailed voltage profiles of bare Zn and Ag-Cu@Zn symmetric cells after cycling 200 h at  $0.25 \text{ mA cm}^{-2}$  (a) and  $0.5 \text{ mA cm}^{-2}$  (b), respectively.

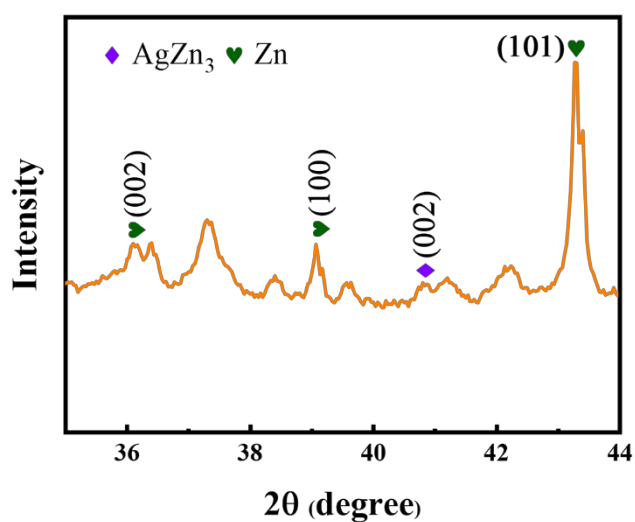

**Figure S4** The magnified view of selected sections from the XRD pattern.

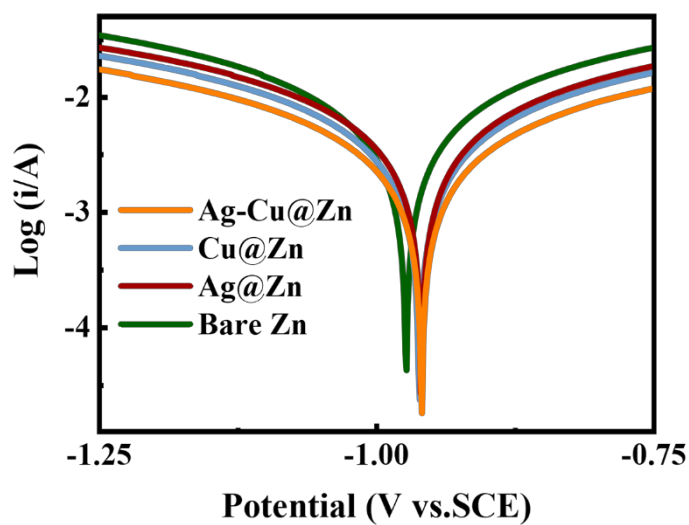

**Figure S5** Linear polarization curve of the brae Zn, Ag@Zn, Cu@Zn, and Ag-Cu@Zn anodes.

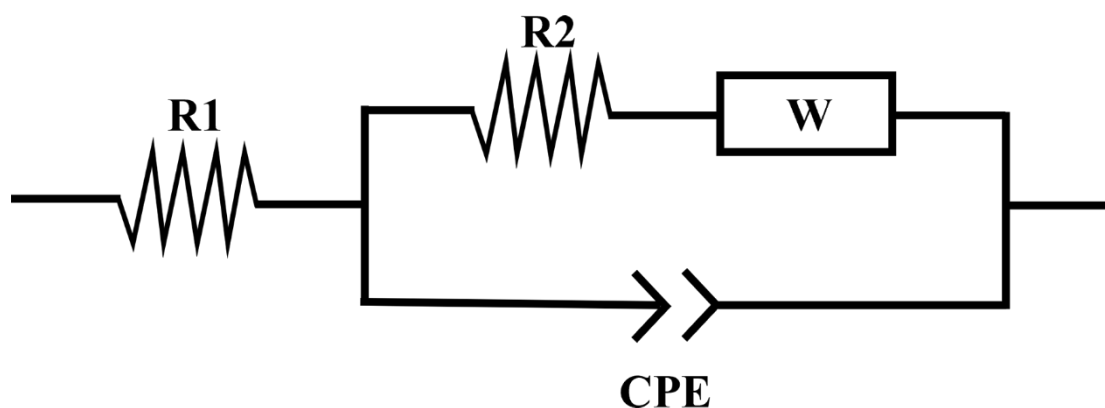

**Figure S6** The equivalent circuit for fitting the EIS of the symmetric cells. R1 denotes the equivalent serial resistance, R2 denotes the charge transfer resistance, W represents the Warburg resistance, and CPE stands for “Constant phase element”.

**Table S1** Comparison with the Ag-Cu@Zn symmetrical cell and other symmetrical cells with different protective layers on Zn foil disc.

| Anode material       | Current density (mA cm <sup>-2</sup> ) | Capacity (mA h cm <sup>-2</sup> ) | Overpotential (mV) | Lifetime (h) | Reference |
|----------------------|----------------------------------------|-----------------------------------|--------------------|--------------|-----------|
| Ag-Cu@Zn (This work) | 0.5                                    | 0.5                               | 25                 | 1500         | /         |
| Zn Sn                | 1                                      | 0.5                               | 50                 | 500          | [34]      |
| CH-Zn                | 0.5                                    | 0.5                               | 27.9               | 800          | [35]      |
| PS-coated Zn         | 0.5                                    | 0.25                              | /                  | 1200         | [36]      |
| PZn                  | 0.5                                    | 0.35                              | 9.6                | 400          | [37]      |
| ZnVO coated Zn       | 0.25                                   | 0.05                              | ~40                | 560~         | [38]      |
| Zn In                | 0.2                                    | 0.2                               | /                  | 1500         | [39]      |
| NA-Zn-60             | 0.25                                   | 0.05                              | 205                | 1600         | [40]      |
| Ag-Zn                | 0.2                                    | 0.2                               | 5                  | ~1400        | [41]      |
| ZnAl                 | 0.5                                    | 0.25                              | /                  | 300          | [42]      |

**Table S2** Comparison with MnO<sub>2</sub>-based batteries with other alloy-modified Zn anodes and some Zn anodes with other types of protective coatings.

| Anode material       | Cathode material            | Initial discharge capacity (mA h g <sup>-1</sup> ) | Capacity retention (%) | Cycle number | Reference |
|----------------------|-----------------------------|----------------------------------------------------|------------------------|--------------|-----------|
| Ag-Cu@Zn (This work) | Commercial MnO <sub>2</sub> | 150                                                | 144                    | 300          | /         |
| ZPS@Zn               | PVO                         | 160                                                | 62                     | 200          | [23]      |
| CH-Zn                | MnO <sub>2</sub> nanowires  | 171                                                | 87                     | 150          | [35]      |

|                                   |                            |      |     |     |      |
|-----------------------------------|----------------------------|------|-----|-----|------|
| PS-coated<br>Zn                   | NVO                        | 180  | ~50 | 100 | [36] |
| PZn                               | NVO                        | 150  | ~90 | 100 | [37] |
| NA-Zn-60                          | CNT/MnO <sub>2</sub>       | ~200 | ~33 | 200 | [40] |
| PAZ@Zn                            | $\delta$ -MnO <sub>2</sub> | 270  | 65  | 100 | [46] |
| Zn <sub>88</sub> Al <sub>12</sub> | KxMnO <sub>2</sub>         | /    | 100 | 200 | [47] |
| Zn@a-Ag<br>mesh                   | LFP                        | 146  | 60  | 100 | [48] |

---
